# Supplementary material for: Molecular Characterization of Barley 3H Semi-Dwarf Genes
Source: PubMed Central journal article supplement (PMC4380412; doi:10.1371/journal.pone.0120558), 2015-03-31
Supplement: pone.0120558.s001.pdf [file pone.0120558.s001.pdf]

1 (I) full sequence of the dwarf NIL line

2 1 CGCTTCTCGC ATGGTCTCAA GGTAGAGCGA GCGAGCTCCC ACATGGATTG CCTGCGGCTG  
3 61 GCGGTAGCGG CGGCGGCGCT CTTTCTCGCG GCGCTCGCGG CGGCGGCCGA CGACGCGCAG  
4 121 CTGCTGGACG AGTTCAGGAT GGGCTGCCCC AGCCAGGCGC CGCTCGAAGG CTGGACCGCG  
5 181 CGGGAGGGCG CCTGCAGGTT CCCC GGCGG GTGTGCGGG GCGGGCGGCT CACGTCGCTC  
6 241 TCGCTCGCCG CCGTCACGCT CAATGCCGAC TTCCGCGCCG TCGCCAACAC CCTGCTGCAG  
7 301 CTCAGCGCCG TCGAGCGGCT CAGCCTGCGC GCGGCCAACG TCAGCGGCGC GCTCGCGGCC  
8 361 GCCAGGTGCG GCGGCAAGCT CGAGGAGCTC GACCTCTCCG GGAATGCCG GCTGCGCGGC  
9 421 TCCGTCGCCG ACGTCGCGC GCTCGCCGCG TCCTGCGGCG CGCTCCGGAC GCTGAATCTC  
10 481 TCCGGTGACG CGGTTGGTGC GGCCAAGCCC GCTGGCGGTG GCGGTGGCGG GCAGGGGTTT  
11 541 GCGGCCCTCG ACGCCCTCGA CTTGTCCAGC AACAAGATCG CCGGAGATGC CGACCTTCGC  
12 601 TGGATGGTGG GTGCCGGCCT TGGGTCTGTC CGGTGGCTGG ACCTCGCCTG GAACAAGATC  
13 661 TCCGGCGGCC TCTCGGACTT CACCAACTGC TCCGGCCTGC AGTACCTTGA CCTATCCGGC  
14 721 AACCTCATCG CCGGCGATGT CGCCGCGGCG GCGCTCTCCG GCTGCGCAG CCTCAGAGCG  
15 781 TCAACCTCT CAGCAACCA TCTCGCCGCG GCGTTCCCGC CCAACATCG CGGCCACC  
16 841 TCGCTCACCG CCCTCAACCT GTCCAACAAC AACTTCTCTG GCGAGGTCCC CGCCGACGCT  
17 901 TTCACCGGCC TGCAGCAGCT CCAGTCGCTG TCCCTCTCCT TCAACCACTT CAGCGGCTCC  
18 961 ATCCCTGATT CCGTCGCTGC GCTGCCGAC CTCGAGGTGC TCGACCTCAG CTCCAACAAC  
19 1021 TTCTCCGGCA GCATCCCCGA CTCCCTCTGC CAAGATCCCA ACTCGAGGCT CCGCGTGCCT  
20 1081 TACCTTCAGA ACAACTATCT CTCCGGCAGC ATCCCGGAGG CCGTCTCCA CTGCAACCGAC  
21 1141 CTCGTCTCCC TCGACCTCAG TCTCAACTAG ATCAACGGCT CCATCCCGGA ATCCCTCGGC  
22 1201 GAGCTTAGCC GCCTCCAGGA CTTTATCATG TGGCAGAACT TACTGGAGGG CGAGATACCT  
23 1261 GCGTCTCTGT CAAGCATTCC CGGCCCTGGAG CATCTCATCC TCGACTACAA CGGGCTCACC  
24 1321 GGCAGCATCC CGCCGGAGCT GGCCAAGTGC AAGCAGCTCA ACTGGATATC CTTGGCGAGC  
25 1381 AACCGGCTGT CTGGGCCGAT CCCCTCGTGG CTTGGGAAGC TCAGCAACTT GGCAATCCTA  
26 1441 AAGCTGAGCA ATAATTCCTT CACCGGAAAG ATACCCGACG AGCTTGGTGA CTGCAAGAGC  
27 1501 TTGGTATGCG TGGACCTCAA CAGCAACCA CTTAATGGAT CAATCCACC CGAGCTGGCA  
28 1561 GAGCAGTCGG GGAAGATGAC CGTTGGCCTC ATTATTGGGC GGCCCTATGT GTATCTTCGC  
29 1621 AACGACGAGC TGAGCAGCCA GTGTGCTGGC AAGGGCAGCT TGCTGGAGTT CTCAAGCATC  
30 1681 CGGTCCGAGG ACCTTAGTCG GATGCCGAGC AAGAAGCTGT GCAACTTCAC AAGGATGTAC  
31 1741 ATGGGGAGCA CAGAGTATAC CTTCAACAAG AATGGCTCCA TGATATTTCT GGATTTGTCA  
32 1801 TTTAATCAGC TTGACTCGGA GATACCCAAG GAGCTTGGA ATATGTCTA CCTCATGATC  
33 1861 ATGAATCTTG GGCACAACCT TCTGTCTGGT GCTATCCCAA CAGAGCTAGC TGGTGCAAAG  
34 1921 AAGCTTGACG TACTTGACCT TTCGCACAAC CGATTGGAAG GGCAGATACC CAGCTCGTTC  
35 1981 TCGTCACTGT CTTTGTCTGA GATCAATCTG TCGAGTAATC AGCTGAATGG GACAATTCOA  
36 2041 GAGCTTGGTT CTCTTGCCAC ATTCCCAAAG AGCCAGTATG AGAACAATC CGGTCTGTGT  
37 2101 GGCTTTCCAC TGCCACCATG TGAGTCGCAT ACTGGGCAAG GCTCTTCCAA CGGTGGCCAA  
38 2161 TCTAACCGGA GGAAGGCGTC CTTTGGCGGC AGCGTTGCTA TGGGACTCTT GTTCTCGCTC  
39 2221 TTCTGTATAT TTGGGTTGGT CATCATAGCC ATCGAGAGCA AGAAGCGGAG GCAGAAGAA  
40 2281 GACGAGGCAA GTACCTCCCG TGATATATAC ATTGATAGCC GGTACATTC TGGCAGCATG  
41 2341 AATTCCAATT GGAGACTCTC TGGTACAAAT GCTCTCAGCA TCAACCTTGC TGCAATTTGAG  
42 2401 AAGCCACTGC AGAAACTCAC CTTGGGTGAT CTTGTTGAGG CCACCAATGG CTTCCACAAT  
43 2461 GATAGCTTGA TTGGGTCTGG TGGATTTGGT GATGTCTACA AGGCACAGCT CAAGGATGGG  
44 2521 AGGGTTGTTG CTATCAAGAA GCTAATACAT GTGAGTGGCC AGGGTGACCG GGAGTTCACA  
45 2581 GCGGAAATGG AGACCATTTG CAAGATCAAA CGCCGCAACC TTGTTCCGCT CCTCGGCTAC  
46 2641 TGCAAGATCG GCGAGGAGCG GCTGCTGATG TATGACTTCA TGAAGTATGG CAGCTTGGAG  
47 2701 GATGTGCTCG ACGACCGCAA AAAGATTGGG GTAAGGCTGA ACTGGGCGGC AAGCGGAAAG  
48 2761 ATTGCAATCG GGGCAGCAAG GGGGTTGGCA TTCCTCCACC ACAACTGCAT TCCGCACATC  
49 2821 ATCCACCAGG ACATGAAGTC AAGCAATGTG CTTGTTGATG AGAATCTGGA GGCAAGGGTC  
50 2881 TCTGATTTTC GCATGGCGAG GATGATGAGT GTGGTGGACA CACACCTGAG CGTGTCCACC  
51 2941 CTCGCCGGCA CGCCGGGGTA TGTGCCACCG GAGTACTACC AGAGCTTCCG ATGCACCACC  
52 3001 AAGGGTGTATG TGTATAGCTA CGGTGTGTG TTGCTGGAGC TGCTCACTGG GAAGCCCCCG  
53 3061 ACGGATTCOA CAGATTTTGG TGAGGACCAT AATCTTGTAG GATGGGTGAA GATGCACACA  
54 3121 AAGTTGAAGA TCACTGATGT GTTTGACCCG GAGCTGCTGA AGGACGATCC CACCCTGGAG  
55 3181 CTTGAGCTGC TGGAGCATTT GAAAATCGCA TGTGCGTGCC TGGATGACAG GCCGTCGAGG  
56 3241 CGACCAACGA TGCTCAAGGT GATGACGATG TTCAAGGAGA TCCAGGCTGG GTCAACGGTG  
57 3301 GACTCGAAAA CCTCGTCGGT GGCTACCGGG CTGAGCGACG ATCCTGGTTT TGGGGTCAATG  
58 3361 GACATGACCC TCAAGGAGGC CAAGGAGGAG AAAGATTAGG AAGATGACCA CCGGCGACAC  
59 3421 GCAGACGGCG GTGACCGGCA GCAACACGTC CGTCCGTCCG TCCAGTTTGG GTTTGGGGGC  
60 3481 GAAAAAACC GTAGAAATCA GCCTCTCAGA TGATTGATGA TGATGTGATG ATACCATCTCT  
61 3541 GAGGTTCCCA CGCAAGCT

(II) full sequence of the tall NIL line

1  
2  
3 1 CGCTTCTCGC ATGGTCTCAA GGTAGAGCGA GCGAGCTCCC ACATGGATTG CCTGCGGCTG  
4 61 GCGGTAGCGG CGGCGGCGCT CTTTCTCGCG GCGCTCGCGG CGGCGGCCGA CGACGCGCAG  
5 121 CTGCTGGACG AGTTCAGGAT GGCGCTGCCG AGCCAGGCGC CGCTCGAAGG CTGGACC GCG  
6 181 CGGGAGGGCG CCTGCAGGTT CCCC GGCGCG GTGTGCCGGG GCGGGCGGCT CACGTCGCTC  
7 241 TCGCTCGCCG CCGTACAGCT CAATGCCGAC TTCCGCGCCG TCGCCAACAC CCTGTGCAG  
8 301 CTCAGCGCCG TCGAGCGGCT CAGCCTGCGC GCGGCCAACG TCAGCGGCGC GCTCGCGGCC  
9 361 GCCAGGTGCG GCGGCAAGCT CGAGGAGCTC GACCTCTCCG GGAATGCCGC GCTGCGCGGC  
10 421 TCCGTCGCCG ACGTCGCCGC GCTCGCCGGC TCCTGCGGCG CGCTCCGGAC GCTGAATCTC  
11 481 TCCGGTGACG CGGTTGGTGC GGCCAAGCCC GCTGGCGGTG GCGGTGGCGG GCAGGGGTTT  
12 541 GCGGCCCTCG ACGCCCTCGA CTTGTCCAGC AACAAGATCG CCGGAGATGC CGACCTTCGC  
13 601 TGGATGGTGG GTGCCGGCCT TGGGTCTGTC CGGTGGCTGG ACCTCGCCTG GAACAAGATC  
14 661 TCCGGCGGCG TCTCGGACTC CACCAACTGC TCCGCCTCG AGTACCTTGA CCTATCCGGC  
15 721 AACCTCATCG CCGGCGATGT CCGCGGCGC GCGCTCTCCG GCTGCGCGC GCTGCGCGC  
16 781 CTCAACCTCT CCAGCAACCA TCTCGCCGGC GCGTTCCCGC CCAACATCGC CGGCCTCACC  
17 841 TCGCTCACCG CCCTCAACCT GTCCAACAAC AACTTCTCTG GCGAGGTCCC CGCCGACGCT  
18 901 TTCACCGGCC TGCAGCAGCT CCAGTCGCTG TCCCTCTCCT TCAACCACCT CAGCGGTCC  
19 961 ATCCCTGATT CCGTCGCTGC GCTGCCGGAC CTCGAGGTGC TCGACCTCAG CTCCAACAAC  
20 1021 TTCTCCGGA GCATCCCCG CTCCCTGTC CAAGATCCCA ACTCGAGGT CCTCGTCTC  
21 1081 TACTTCCAGA ACAACTATCT CTCGGGACG ATCCCGGAG CCGTCTCCAA CTGCACGAC  
22 1141 CTCGTCTCCC TCGACCTCAG TCTCAACTAC ATCAACGGCT CCATCCCGGA ATCCCTCGGC  
23 1201 GAGCTTAGCC GCCTCCAGGA CTTTATCATG TGGCAGAACT TACTGGAGGG CGAGATACCT  
24 1261 GCGTCTCTGT CAAGCATTCC CGGCCTGGAG CATCTCATCC TCGACTACAA CGGGCTCACC  
25 1321 GGCAGCATCC CGCCGGAGCT GGCCAAGTGC AAGCAGCTCA ACTGGATATC CTTGGCGAGC  
26 1381 AACCGGCTGT CTGGGCCGAT CCCCTCGTGG CTTGGGAAGC TCAGCAACTT GGCAATCTA  
27 1441 AAGTGAGCA ATAATTCCTT CACCGGAAAG ATACCCGACG AGCTTGGTGA CTGCAAGAGC  
28 1501 TTGGTATGCG TGGACCTCAA CAGCAACCAA CTTAATGGAT CAATTCCACC CGAGCTGGCA  
29 1561 GAGCAGTCGG GGAAGATGAC CGTTGGCCTC ATTATTTGGC GGCCCTATGT GTATCTTCGC  
30 1621 AACGACGAGC TGAGCAGCCA GTGTGCTGGC AAGGGCAGCT TGCTGGAGTT CTCAAGCATC  
31 1681 CGGTCCGAGG ACCTTAGTCG GATGCCGAGC AAGAAGCTGT GCAACTTCAC AAGGATGTAC  
32 1741 ATGGGGAGCA CAGAGTATAC CTTCAACAAG AATGGCTCCA TGATATTTCT GGATTTGTCA  
33 1801 TTAAATCAGC TTGACTCGGA GATACCCAAG GAGCTTGGCA ATATGTCTA CCTCATGATC  
34 1861 ATGAATCTTG GGCACAACCT TCTGTCTAGT GCTATCCCAA CAGAGCTAGC TGGTGCAAAG  
35 1921 AAGCTTTCAG TACTTGACCT TTCGCACAA CGATTGGAAG GGCAGATACC CAGCTCGTTC  
36 1981 TCGTCACTGT CTTTGTCTGA GATCAATCTG TCGAGTAATC AGCTGAATGG GACAATTTCA  
37 2041 GAGCTTGGTT CTCTTGCCAC ATTCCCAAAG AGCCAGTATG AGAACAATC CGGTCTGTGT  
38 2101 GGCTTTCCAC TGCCACCATG TGAGTCGAT ACTGGGCAAG GCTCTTCCAA CGGTGGCCAA  
39 2161 TCTAACCGGA GGAAGCGGTC CCTTGGCGGC AGCGTTGCTA TGGGACTCTT GTTCTCGCTC  
40 2221 TTCTGTATAT TTGGGTGGT CATCATAGCC ATCGAGAGCA AGAAGCGGAG GCAGAAGAAT  
41 2281 GACGAGGCAA GTACCTCCCG TGATATATAC ATTGATAGCC GGTACATTC TGGCACGATG  
42 2341 AATTCCAATT GGAGACTCTC TGGTACAAAT GCTCTCAGCA TCAACCTTGC TGCATTTGAG  
43 2401 AAGCCACTGC AGAAACTCAC CTTGGGTGAT CTTGTTGAGG CCACCAATGG CTTCCACAAT  
44 2461 GATAGCTTGA TTGGGTCTGG TGGATTTGGT GATGTCTACA AGGCACAGCT CAAGGATGGG  
45 2521 AGGGTTGTTG CTATCAAGAA GCTAATACAT GTGAGTGGCC AGGGTGACCG GGAGTTTACA  
46 2581 GCGGAAATGG AGACCATTGG CAAGATCAA CACCGCAACC TTGTTCCGCT CCTCGGTAC  
47 2641 TGCAAGATCG GCGAGGAGCG CAGTCTGATG TATGACTTCA TGAAGTATGG CAGCTTGGAG  
48 2701 GATGTGCTGC ACGACCGCAA AAAGATTGGG GTAAGGCTGA ACTGGGCGC AAGGCGAAAG  
49 2761 ATTGCAATCG GGGCAGCAAG GGGGTGGCA TTCCTCCACC ACAACTGCAT TCCGCACATC  
50 2821 ATCCACCAGG ACATGAAGTC AAGCAATGTG CTTGTTGATG AGAATCTGGA GGCAAGGGTC  
51 2881 TCTGATTTG CAGATGGCGAG GATGATGAGT GTGGTGGACA CACACCTGAG CGTGTCCACC  
52 2941 CTCGCCGGCA CGCCGGGGTA TGTGCCACCG GAGTACTACC AGAGCTTCCG ATGCACCACC  
53 3001 AAGGGTGTAT TGTATAGTCA CGGTGTGTG TTGCTGGAGC TGCTACTGAG GAAGCCCCG  
54 3061 ACGGATTCAA CAGATTTTGG TGAGGACCAT AATCTTGTAG GATGGGTGAA GATGCACACA  
55 3121 AAGTTGAAGA TCACTGATGT GTTTGACCCG GAGCTGCTGA AGGACGATCC CACCCTGGAG  
56 3181 CTTGAGCTGC TGGAGCATTT GAAAATCGCA TGTGCGTGCC TGGATGACAG GCCGTCGAGG  
57 3241 CGACCAACGA TGCTCAAGGT GATGACGATG TTCAAGGAGA TCCAGGCTGG GTCAACGGTG  
58 3301 GACTCGAAAA CCTCGTCCGT GGCTACCGGG CTGAGCGACG ATCCTGTTT TGGGGTATG  
59 3361 GACATGACCC TCAAGGAGGC CAAGGAGGAG AAAGATTAGG AAGATGACCA CCGGCGACAC  
60 3421 GCAGACGGCG GTGACCGGCA GCAACACGTC CGTCCGTCG TCCAGTTTGG GTTTGGGGC  
61 3481 GAAAAAACC GTAGAAATCA GCCTCTCAGA TGATTGATGA TGATGTGATG ATACCATTCT  
62 3541 GAGGTTCCCA CGCAAGCT  
63  
64
